# Supplementary material
Source: Springer Nature journal article supplement (https://www.springerprofessional.de/resource/supplementary/40095_2011_8_MOESM7_ESM.pdf/11899688)
Supplement: MOESM7 [file 11899688]

## Sensitivity variables

 Primary Load (kWh/d)  Wind Speed (m/s)  Diesel Price (\$/L) 

Double click on a system below for simulation results.

 Categori  Overall  

|  |  |  |  |  | W... | N... | D925 (kW) | D925 (kW) | T-105 | Conv. (kW) | Initial Capital | Operating Cost (\$/yr) | Total NPC     | COE \$/kW... | Ren. Frac. | Diesel (L) | D925 (hrs) | D925 (hrs) | Batt. Lf (yr) |
|--|--|--|--|--|------|------|-----------|-----------|-------|------------|-----------------|------------------------|---------------|--------------|------------|------------|------------|------------|---------------|
|  |  |  |  |  | 6    | 3    | 925       | 925       | 500   | 250        | \$ 2,515,000    | 717,349                | \$ 10,874,687 | 0.218        | 0.37       | 783,529    | 7,406      | 4          | 6.3           |
|  |  |  |  |  | 6    | 3    | 925       | 925       | 400   | 250        | \$ 2,494,000    | 719,809                | \$ 10,882,348 | 0.218        | 0.37       | 790,927    | 7,497      | 3          | 6.9           |
|  |  |  |  |  | 6    | 3    | 925       | 925       | 600   | 250        | \$ 2,536,000    | 716,421                | \$ 10,884,867 | 0.218        | 0.37       | 779,219    | 7,353      | 5          | 6.3           |
|  |  |  |  |  | 6    | 3    | 925       | 925       | 700   | 250        | \$ 2,557,000    | 715,555                | \$ 10,895,774 | 0.218        | 0.37       | 776,015    | 7,314      | 4          | 6.5           |
|  |  |  |  |  | 6    | 3    | 925       | 925       | 300   | 250        | \$ 2,473,000    | 723,931                | \$ 10,909,385 | 0.219        | 0.36       | 800,916    | 7,619      | 4          | 8.8           |
|  |  |  |  |  | 6    | 3    | 925       | 925       | 800   | 250        | \$ 2,578,000    | 714,937                | \$ 10,909,582 | 0.219        | 0.37       | 773,429    | 7,283      | 2          | 6.8           |
|  |  |  |  |  | 6    | 3    | 925       | 925       | 900   | 250        | \$ 2,599,000    | 713,855                | \$ 10,917,965 | 0.219        | 0.37       | 770,929    | 7,252      | 3          | 7.2           |
|  |  |  |  |  | 6    | 3    | 925       | 925       | 1000  | 250        | \$ 2,620,000    | 713,220                | \$ 10,931,568 | 0.219        | 0.37       | 769,292    | 7,232      | 3          | 7.6           |
|  |  |  |  |  | 6    | 3    | 925       | 925       | 1100  | 250        | \$ 2,641,000    | 711,971                | \$ 10,938,014 | 0.219        | 0.37       | 767,470    | 7,210      | 2          | 8.1           |
|  |  |  |  |  | 6    | 3    | 925       | 925       | 1200  | 250        | \$ 2,662,000    | 711,365                | \$ 10,951,948 | 0.220        | 0.37       | 766,244    | 7,195      | 2          | 8.6           |
|  |  |  |  |  | 6    | 3    | 925       | 925       | 1300  | 250        | \$ 2,683,000    | 710,431                | \$ 10,962,066 | 0.220        | 0.37       | 764,807    | 7,177      | 3          | 9.1           |
|  |  |  |  |  | 6    | 3    | 925       | 925       | 1400  | 250        | \$ 2,704,000    | 709,815                | \$ 10,975,885 | 0.220        | 0.37       | 763,798    | 7,164      | 5          | 9.5           |
|  |  |  |  |  | 6    | 3    | 925       | 925       | 1500  | 250        | \$ 2,725,000    | 709,163                | \$ 10,989,287 | 0.220        | 0.38       | 762,766    | 7,152      | 3          | 10.0          |
